# Supplementary material
Source: MDPI journal article supplement (https://www.mdpi.com/2073-4352/13/3/424)
Supplement: s1 [file s1]

## Supporting Information

# Investigation of Solid-State Hydrate-Anhydrous Phase Transformations of Dabigatran Etexilate Hemi-Edisylate

Jin Feng <sup>1,†</sup>, Changjin Lim <sup>2,†</sup>, Sihyun Nam <sup>3,†</sup>, Woojin Yoon <sup>4</sup>, Hoseop Yun <sup>4,\*</sup>, Woo-Sik Kim <sup>5,\*</sup> and Ji-Hun An <sup>3,\*</sup>

<sup>1</sup> Medical College, Anhui University of Science and Technology, Huainan 232001, China

<sup>2</sup> School of Pharmacy, Jeonbuk National University, Jeonju 54896, Jeonbuk, Republic of Korea

<sup>3</sup> R&D Center, UniCel Lab, Uiwang 16079, Gyeonggi, Republic of Korea

<sup>4</sup> Department of Chemistry and Energy Systems Research, Ajou University, Suwon 16499, Gyeonggi, Republic of Korea

<sup>5</sup> Functional Crystallization Center, Department of Chemical Engineering, Kyung Hee University, Yongin 17104, Gyeonggi, Republic of Korea

\* Correspondence: hsyun@ajou.ac.kr (H.Y.); wskim@khu.ac.kr (W.-S.K.); wertyui12@unicellab.com (J.-H.A.)

† These authors contributed equally to this work.

## Table of Contents

|                                                                                                                                                                                 |    |
|---------------------------------------------------------------------------------------------------------------------------------------------------------------------------------|----|
| I. Figure S1: Simulated PXRD pattern and Powder PXRD pattern for DBE monohydrate.....                                                                                           | S1 |
| II. Figure S2: Solution-state <sup>1</sup> H-NMR spectra of DBG and DBE (solvent: DMSO-d <sub>6</sub> ): (a) 1 ppm–5 ppm, (b) 6 ppm–10.5 ppm.....                               | S2 |
| III. Figure S3: Solution-state <sup>13</sup> C-NMR spectra of DBG and DBE (solvent: DMSO-d <sub>6</sub> ).....                                                                  | S3 |
| IV. Figure S4: Solution-state 2D NMR <sup>1</sup> H- <sup>1</sup> H COSY spectra of DBG and DBE (solvent: DMSO-d <sub>6</sub> ).....                                            | S4 |
| V. Figure S5: Solution-state 2D NMR <sup>1</sup> H- <sup>13</sup> C HSQC spectra of DBG and DBE (solvent: DMSO-d <sub>6</sub> ).....                                            | S5 |
| VI. Figure S6: Solution-state 2D NMR <sup>1</sup> H- <sup>13</sup> C HMBC spectra of DBG and DBE (solvent: DMSO-d <sub>6</sub> ) .....                                          | S6 |
| VII. Figure S7: TGA curves of DBE form-II after 3 days storage at relative humidity (RH) 53%, 64%, 75% conditions (heating rate 10 °C/min, temperature range 30 °C–300 °C)..... | S7 |
| VIII. Figure S8: PXRD pattern of DBE anhydrate after 3 days of storage at relative humidity (RH) conditions of 53%, 64%, and 75%. .....                                         | S8 |

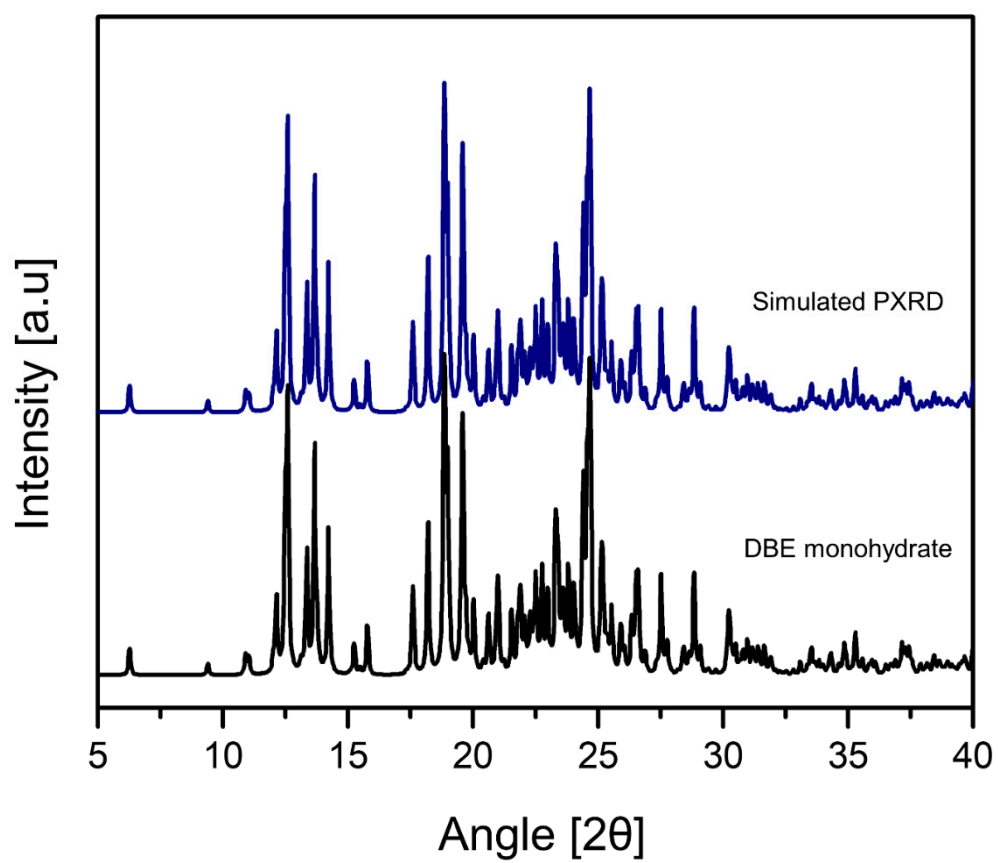

**Figure S1.** Simulated PXRD pattern and Powder PXRD pattern for DBE monohydrate.

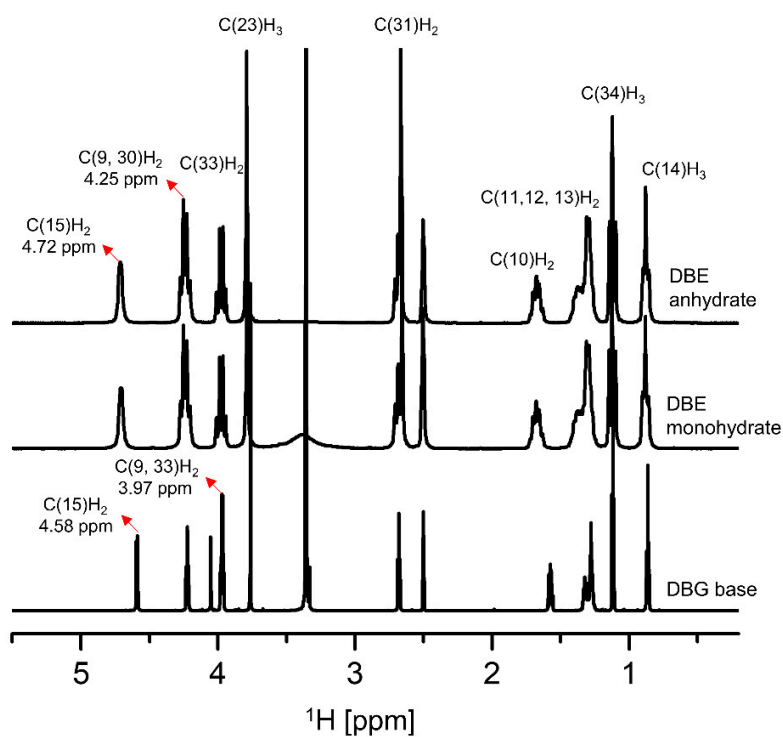

(a)

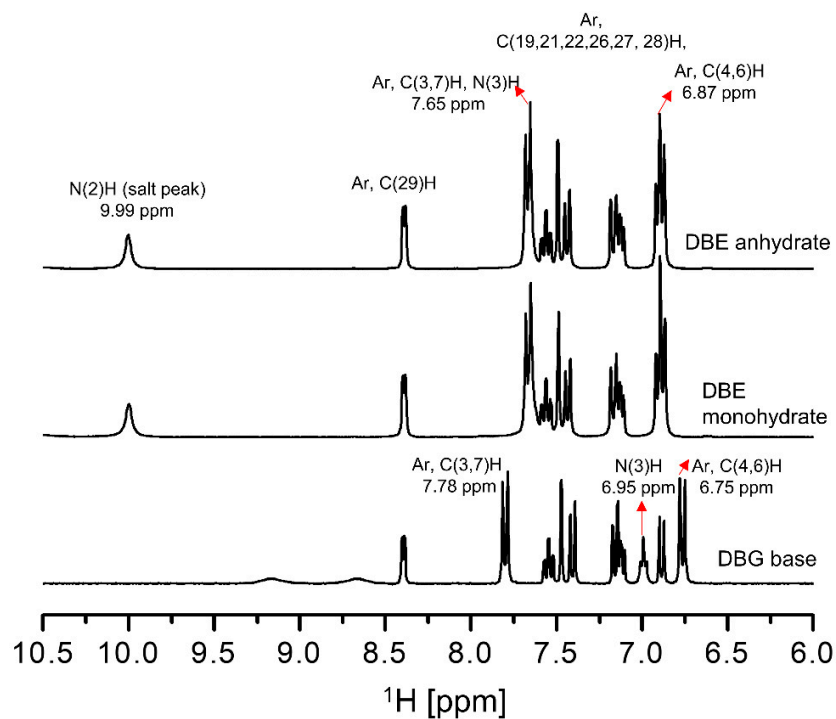

(b)

**Figure S2.** Solution-state  $^1\text{H}$ -NMR spectra of DBG and DBE (solvent:  $\text{DMSO-d}_6$ ): (a) 1 ppm-5 ppm, (b) 6 ppm–10.5 ppm.

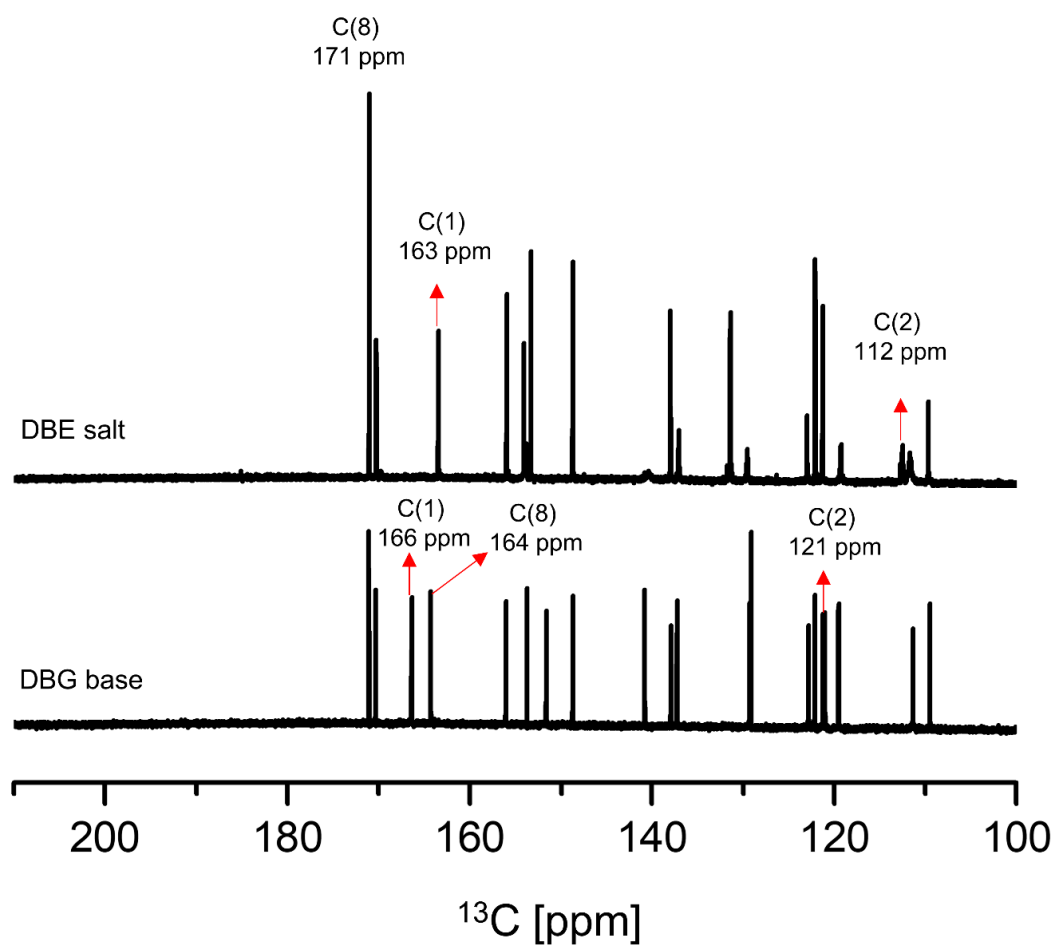

**Figure S3.** Solution-state  $^{13}\text{C}$ -NMR spectra of DBG and DBE (solvent:  $\text{DMSO-d}_6$ ).

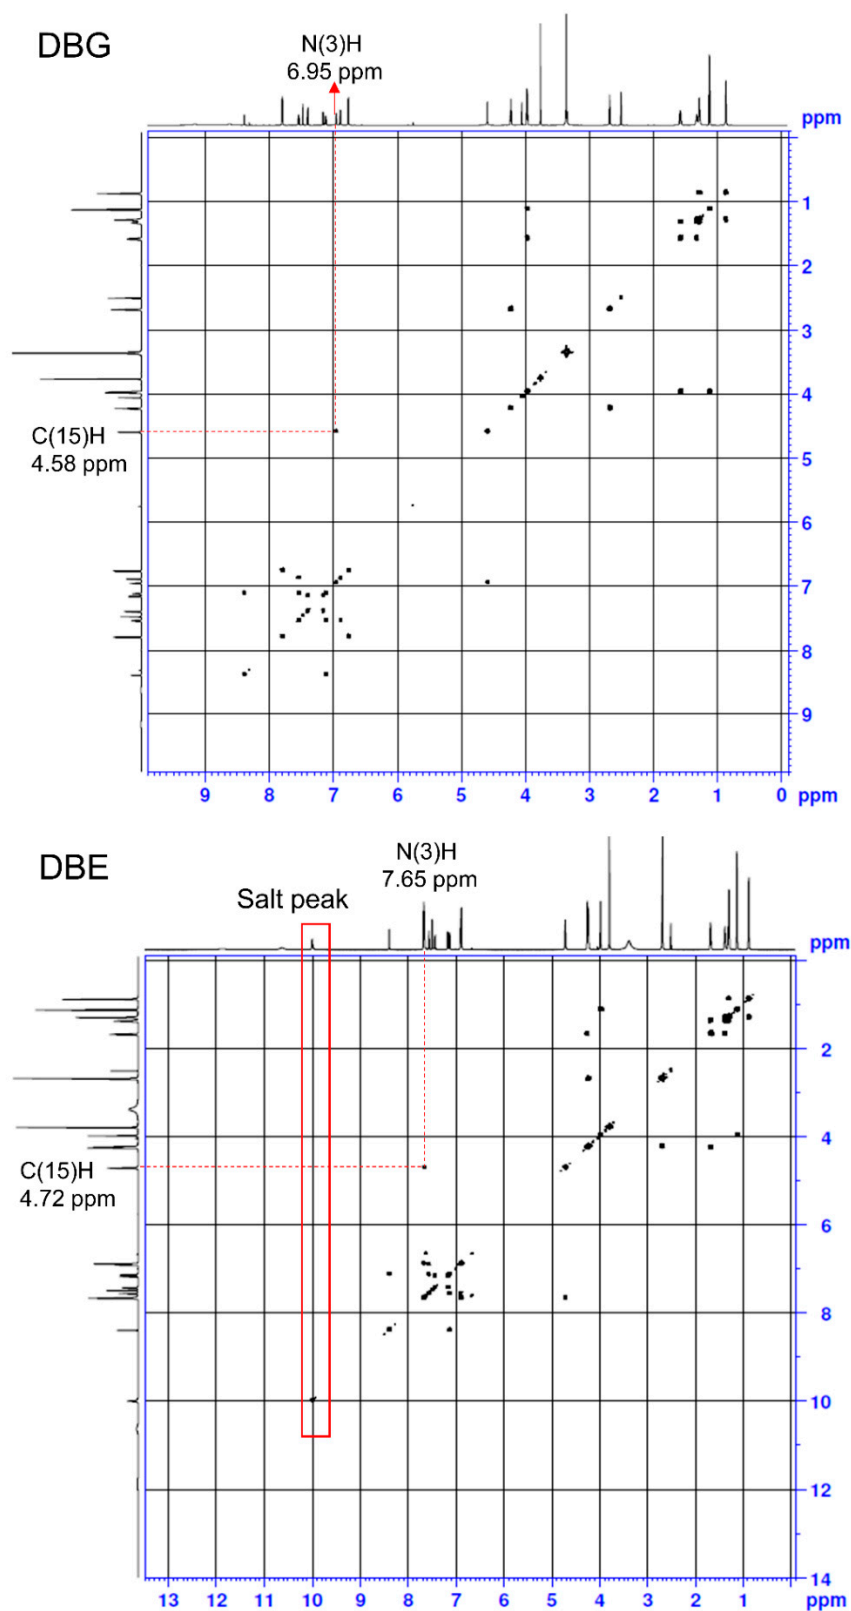

**Figure S4.** Solution-state 2D NMR  $^1\text{H}$ - $^1\text{H}$  COSY spectra of DBG and DBE (solvent: DMSO- $\text{d}_6$ ).

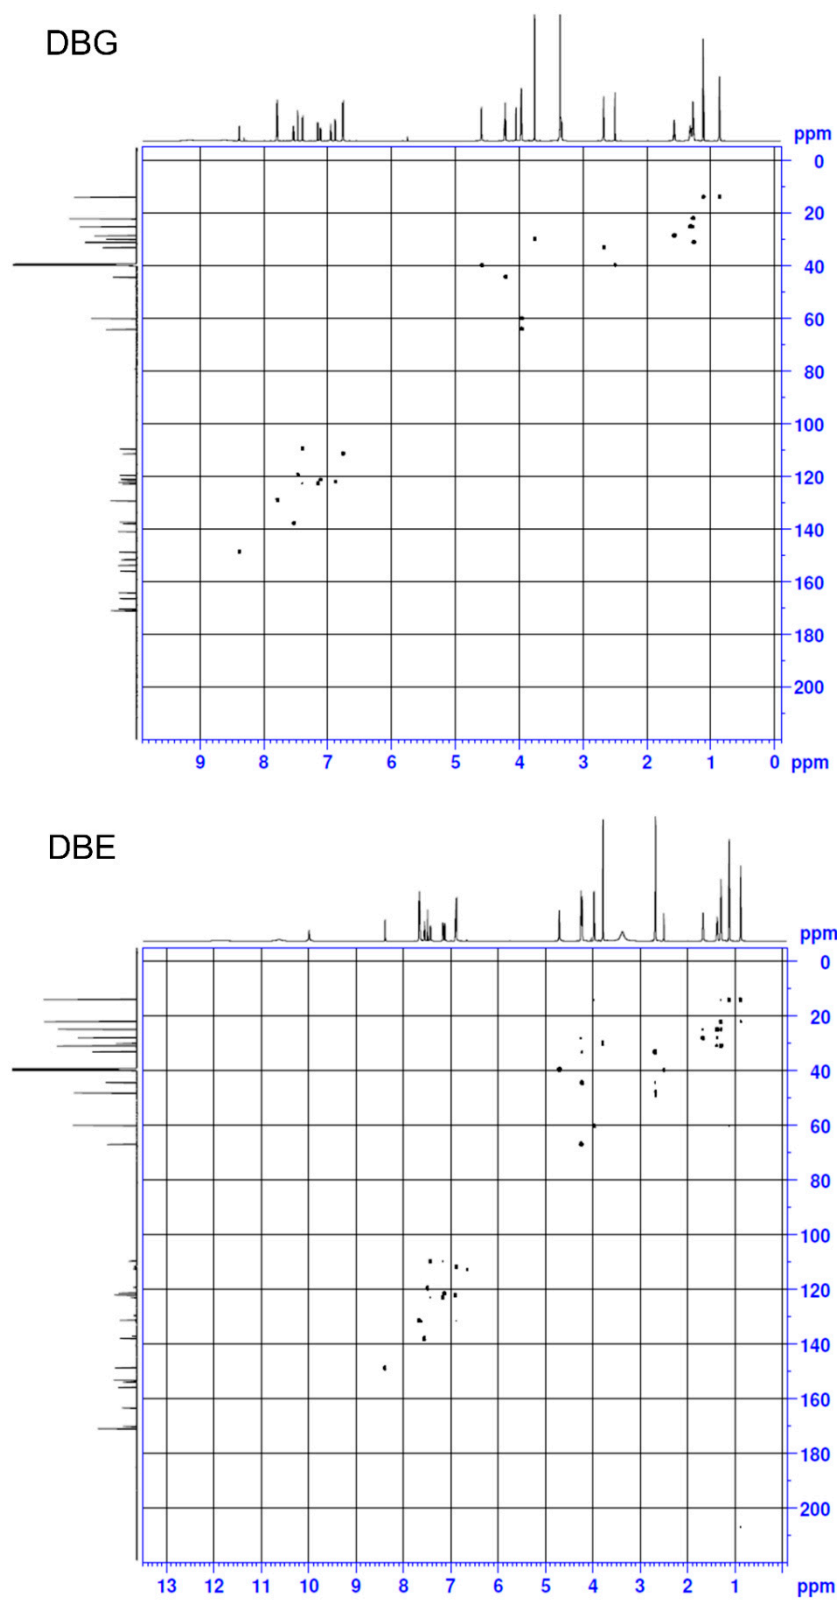

**Figure S5.** Solution-state 2D NMR  $^1\text{H}$ - $^{13}\text{C}$  HSQC spectra of DBG and DBE (solvent:  $\text{DMSO-d}_6$ ).

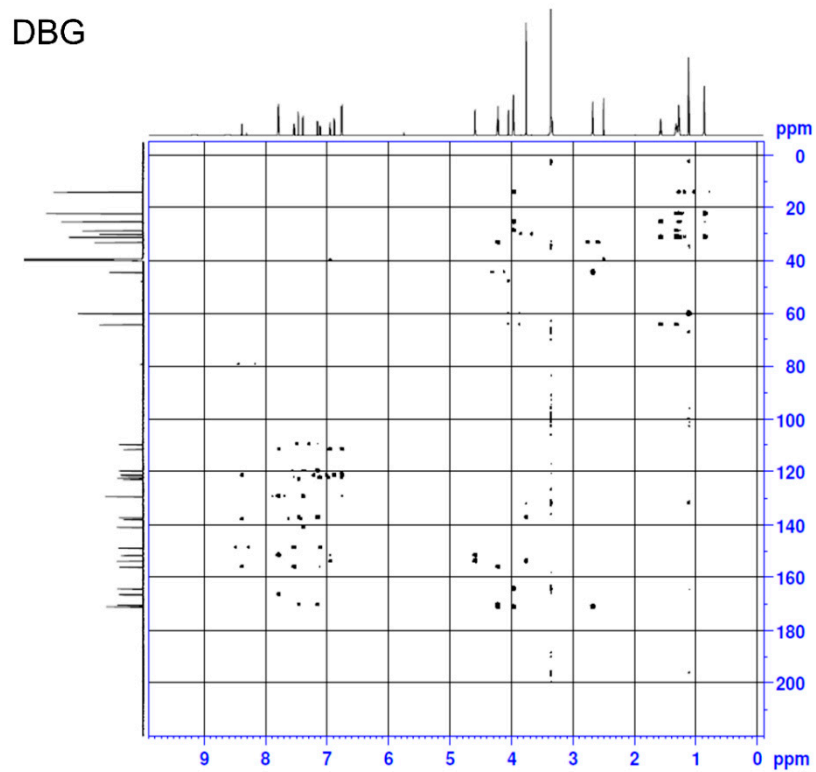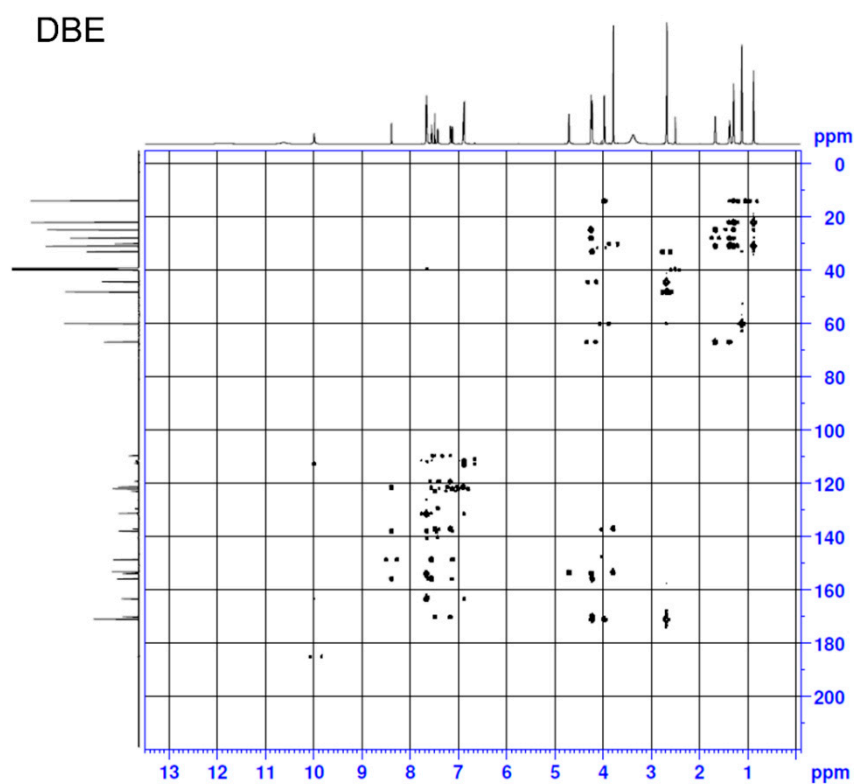

**Figure S6.** Solution-state 2D NMR  $^1\text{H}$ - $^{13}\text{C}$  HMBC spectra of DBG and DBE (solvent:  $\text{DMSO-d}_6$ ).

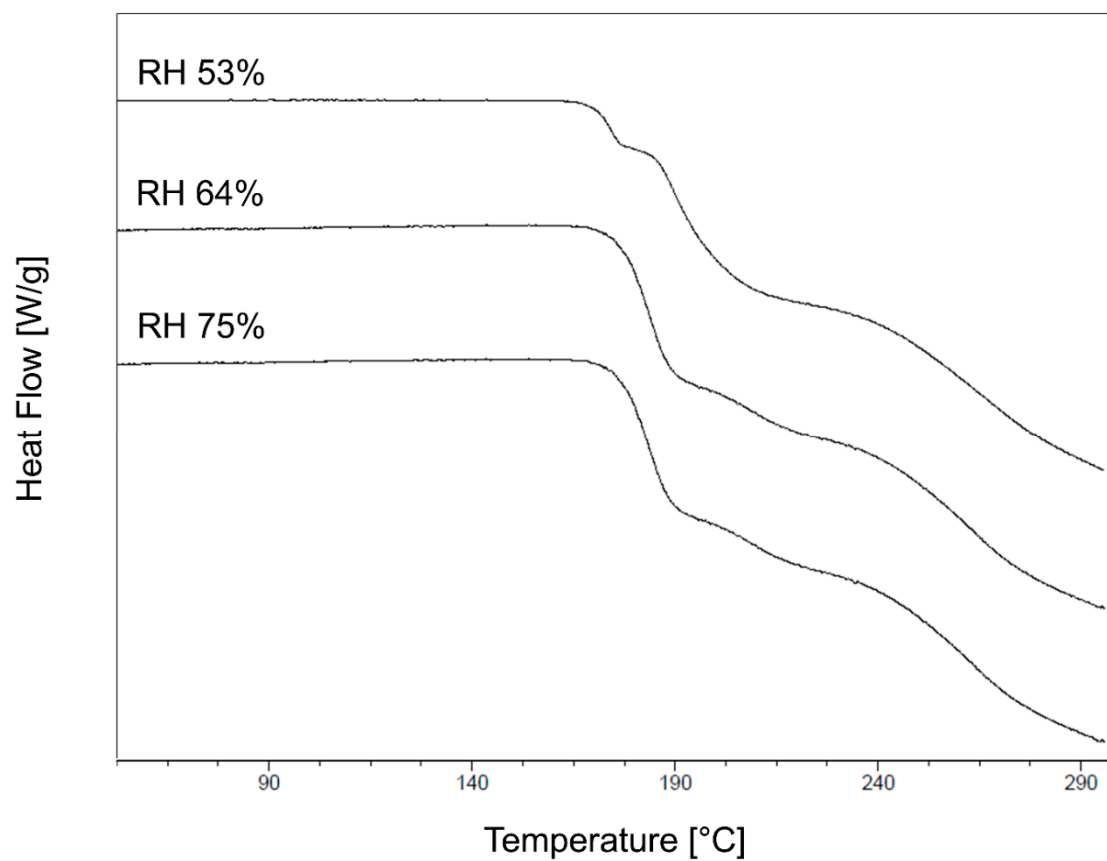

**Figure S7.** TGA curves of DBE anhydrate after 3 days storage at relative humidity (RH) 53%, 64%, 75% conditions (heating rate 10 °C/min, temperature range 30 °C–300 °C).



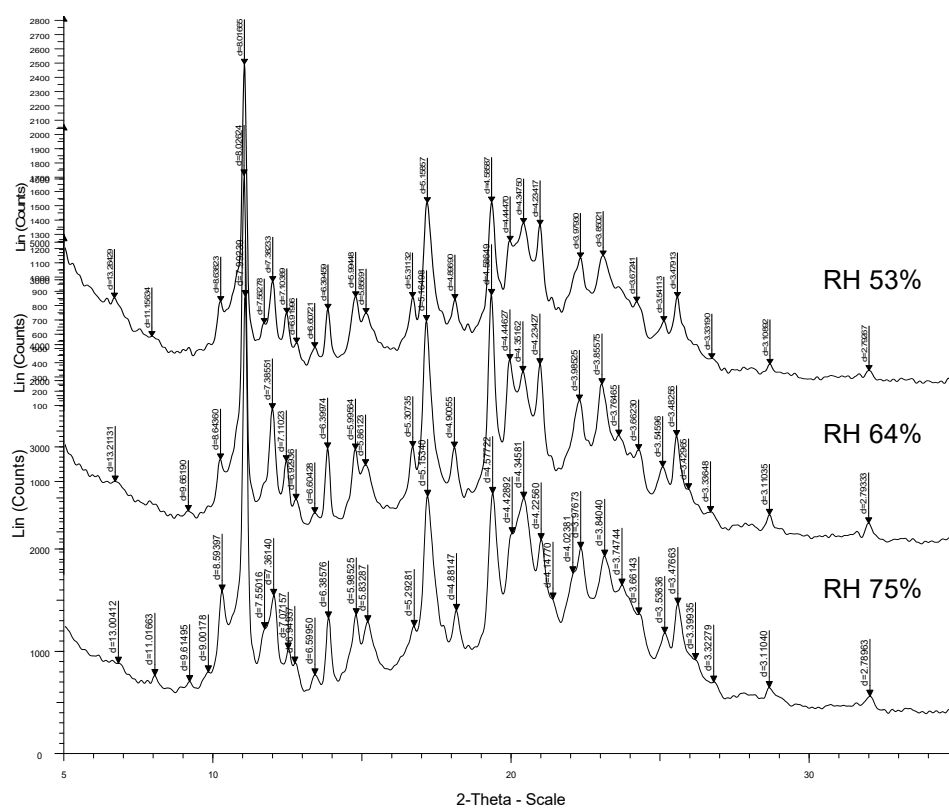

**Figure S8.** PXRD pattern of DBE anhydrate after 3 days of storage at relative humidity (RH) conditions of 53%, 64%, and 75%.
